# Supplementary material
Source: PubMed Central journal article supplement (PMC7092813)
Supplement: NIHMS1563259-supplement-supplemental_table.pdf [file NIHMS1563259-supplement-supplemental_table.pdf]

**Appendix**  
**National Prevalence of Sexual Violence by a Workplace-Related Perpetrator**  
**Basile et al.**

**Appendix Table1.** Items Listed Under Each Sexual Violence Behavior, NISVS

| Sexual violence behavior                                                                                              | Items                                                                                          |
|-----------------------------------------------------------------------------------------------------------------------|------------------------------------------------------------------------------------------------|
| Rape/being made to penetrate someone <sup>a</sup>                                                                     |                                                                                                |
| When you were drunk, high, drugged, or passed out and unable to consent, how many people have ever...                 | ...had vaginal sex with you?                                                                   |
|                                                                                                                       | ... {if male} made you perform anal sex?                                                       |
|                                                                                                                       | ...made you receive anal sex?                                                                  |
|                                                                                                                       | ...put their mouth on your {if male: penis; if female: vagina}?                                |
|                                                                                                                       | ...put their mouth on your anus?                                                               |
|                                                                                                                       | ...made you put your mouth on their vagina or anus?                                            |
|                                                                                                                       | ...made you put your mouth on their penis?                                                     |
|                                                                                                                       | ...put their fingers or an object in your {if female: vagina or} anus?                         |
| How many people have ever used physical force or threats to physically harm you to...                                 |                                                                                                |
|                                                                                                                       | ...have vaginal sex?                                                                           |
|                                                                                                                       | ... {if male} perform anal sex?                                                                |
|                                                                                                                       | ...receive anal sex?                                                                           |
|                                                                                                                       | ...put their mouth on your {if male: penis; if female: vagina}?                                |
|                                                                                                                       | ...put their mouth on your anus?                                                               |
|                                                                                                                       | ...make you put your mouth on their vagina or anus?                                            |
|                                                                                                                       | ...make you put your mouth on their penis?                                                     |
|                                                                                                                       | ...put their fingers or an object in your {if female: vagina or} anus?                         |
| How many people have ever used physical force or threats of physical harm to do the following but sex did not happen? |                                                                                                |
|                                                                                                                       | {if male} TRY to make you have vaginal sex with them                                           |
|                                                                                                                       | TRY to have {if female: vaginal,} oral, or anal sex with you                                   |
| Sexual coercion                                                                                                       |                                                                                                |
| How many people have you had vaginal, oral, or anal sex with after they pressured you by...                           |                                                                                                |
|                                                                                                                       | ...doing things like telling you lies, making promises about the future they knew were untrue, |

**Appendix**  
**National Prevalence of Sexual Violence by a Workplace-Related Perpetrator**  
**Basile et al.**

|                                         |                                                                                               |
|-----------------------------------------|-----------------------------------------------------------------------------------------------|
|                                         | threatening to end your relationship, or threatening to spread rumors about you?              |
|                                         | ...wearing you down by repeatedly asking for sex, or showing they were unhappy?               |
|                                         | ...using their influence or authority over you, for example, your boss or your teacher?       |
| Unwanted sexual contact                 |                                                                                               |
| How many people have ever...            |                                                                                               |
|                                         | ...kissed you in a sexual way when you didn't want it to happen?                              |
|                                         | ...fondled, groped, grabbed, or touched you in a way that made you feel unsafe?               |
| Non-contact unwanted sexual experiences |                                                                                               |
| How many people have ever...            |                                                                                               |
|                                         | ...exposed their sexual body parts to you, flashed you, or masturbated in front of you?       |
|                                         | ...made you show your sexual body parts to them when you didn't want it to happen?            |
|                                         | ...made you look at or participate in sexual photos or movies?                                |
|                                         | ...verbally harassed you while you were in a public place in a way that made you feel unsafe? |

*Note:* All questions were yes/no type; each sexual violence behavior was defined by presenting any of the items in the category except for rape/being made to penetrate, which was defined by an algorithm.

NISVS, National Intimate Partner and Sexual Violence Survey.

**Appendix**  
**National Prevalence of Sexual Violence by a Workplace-Related Perpetrator**  
**Basile et al.**

**Appendix Table 2.** Items to Define Lifetime Impacts of Sexual Violence

| <b>Impact</b>                          | <b>Because of what the perpetrator did to you...</b>                                                                           |
|----------------------------------------|--------------------------------------------------------------------------------------------------------------------------------|
| Fearful                                | ...were you ever fearful when the violence behavior happened with the perpetrator?                                             |
| Concerned for safety                   | ...were you ever concerned for your safety?                                                                                    |
| Any PTSD symptoms <sup>a</sup>         | ...did you ever have nightmares?                                                                                               |
|                                        | ...did you ever try hard not to think about or go out of your way to avoid being reminded of what {fill: initials} did to you? |
|                                        | ...did you ever feel like you were constantly on guard, watchful, or easily startled?                                          |
|                                        | ...did you ever feel numb or detached from others, your activities, or your surroundings?                                      |
| Injury                                 | ...were you ever injured?                                                                                                      |
| Missed at least one day of work/school | ...how many days did you miss work or school?                                                                                  |

*Note:* All questions were yes/no type, except that the question on missed work or school was based on number of days.

<sup>a</sup>Participants were determined to have PTSD symptoms if they presented any of the items in the category.

PTSD, post-traumatic stress disorder.
